# Supplementary material for: How can carbon favor planar multi-coordination in boron-based clusters? Global structures of CBxEy2−(E = Al, Ga, x + y = 4)
Source: Royal Society of Chemistry journal article supplement (doi:10.1039/c5cp04776e), 2015-01-01
Supplement: c5cp04776e1.pdf [file c5cp04776e1.pdf]

**How can carbon favor the planar multi-coordination in boron-based clusters?**

**Global structures of  $CB_xE_y^{2-}$  (E=Al, Ga,  $x+y=4$ )**

**Supporting Information.**

Zhong-hua Cui,<sup>[a]</sup> Jing-jing Sui,<sup>[a]</sup> Yi-hong Ding\*<sup>[a]</sup>

<sup>[a]</sup>*Institute of Theoretical Chemistry, Jilin University, Changchun 130023, People's Republic of China;*

**I: Full citations for reference.**

**II. Geometrical information at the M06-2X and B3LYP methods.**

**III. T1 diagnostic values**

**IV: Coordinates and absolute energies (a.u.) of the low-lying isomers of  $CB_xE_y^{2-}$  (E=Al, Ga,  $x+y=4$ )**

M. J. Frisch, G. W. Trucks, H. B. Schlegel, G. E. Scuseria, M. A. Robb, J. R. Cheeseman, G. Scalmani, V. Barone, B. Mennucci, G. A. Petersson, H. Nakatsuji, M. Caricato, X. Li, H. P. Hratchian, A. F. Izmaylov, J. Bloino, G. Zheng, J. L. Sonnenberg, M. Hada, M. Ehara, K. Toyota, R. Fukuda, J. Hasegawa, M. Ishida, T. Nakajima, Y. Honda, O. Kitao, H. Nakai, T. Vreven, J. A. Montgomery, Jr., J. E. Peralta, F. Ogliaro, M. Bearpark, J. J. Heyd, E. Brothers, K. N. Kudin, V. N. Staroverov, R. Kobayashi, J. Normand, K. Raghavachari, A. Rendell, J. C. Burant, S. S. Iyengar, J. Tomasi, M. Cossi, N. Rega, J. M. Millam, M. Klene, J. E. Knox, J. B. Cross, V. Bakken, C. Adamo, J. Jaramillo, R. Gomperts, R. E. Stratmann, O. Yazyev, A. J. Austin, R. Cammi, C. Pomelli, J. W. Ochterski, R. L. Martin, K. Morokuma, V. G. Zakrzewski, G. A. Voth, P. Salvador, J. J. Dannenberg, S. Dapprich, A. D. Daniels, O. Farkas, J. B. Foresman, J. V. Ortiz, J. Cioslowski, and D. J. Fox, *Gaussian 09, Revision A.02*. Gaussian, Inc., Wallingford CT, 2009.

II. Figure S1. The geometrical information obtained at the M06-2X and B3LYP with aug-cc-pVTZ basis set.

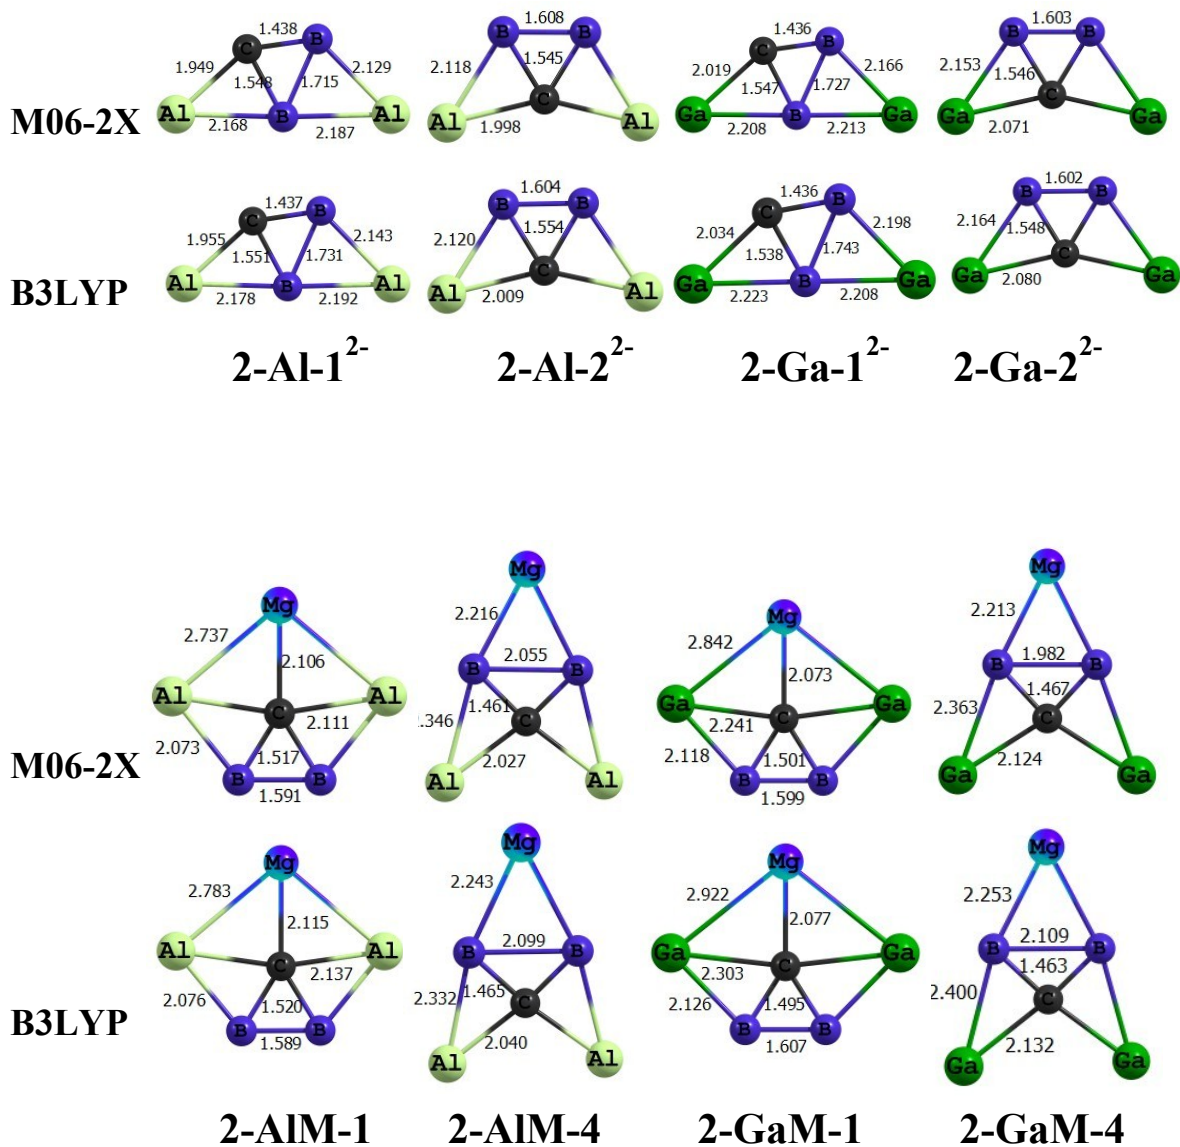

III. Table S1. T1 diagnostic values computed for the global minimum and the closest isomers.

| T1 | CB <sub>4</sub> <sup>2-</sup> | CB <sub>3</sub> Al <sup>2-</sup> | CB <sub>3</sub> Ga <sup>2-</sup> | CB <sub>2</sub> Al <sub>2</sub> <sup>2-</sup> | CB <sub>2</sub> Ga <sub>2</sub> <sup>2-</sup> | CBA <sub>3</sub> <sup>2-</sup> | CBGa <sub>3</sub> <sup>2-</sup> |
|----|-------------------------------|----------------------------------|----------------------------------|-----------------------------------------------|-----------------------------------------------|--------------------------------|---------------------------------|
| 01 | 0.071                         | 0.025                            | 0.023                            | 0.020                                         | 0.017                                         | 0.021                          | 0.018                           |
| 02 | 0.074                         | 0.028                            | 0.030                            | 0.022                                         | 0.018                                         | 0.025                          | 0.022                           |

| T1 | CB <sub>3</sub> AlMg | CB <sub>3</sub> GaMg | CB <sub>2</sub> Al <sub>2</sub> Mg | CB <sub>2</sub> Ga <sub>2</sub> Mg | CBA <sub>3</sub> Mg | CBGa <sub>3</sub> Mg |
|----|----------------------|----------------------|------------------------------------|------------------------------------|---------------------|----------------------|
| 01 | 0.026                | 0.024                | 0.025                              | 0.020                              | 0.021               | 0.018                |
| 02 | 0.026                | 0.022                | 0.024                              | 0.020                              | 0.027               | 0.021                |

IV. Coordinates and absolute energies of CB<sub>x</sub>E<sub>y</sub><sup>2-</sup> and CB<sub>x</sub>E<sub>y</sub>Mg (E=Al, Ga, x+y=4) systems obtained at the (U)B3LYP/aug-cc-pVTZ level.

S1-1. CB<sub>x</sub>E<sub>y</sub><sup>2-</sup>

0-1<sup>2-</sup> HF=-137.2426456  
 6 1.479652000 -0.370948000 -0.058468000  
 5 0.715248000 0.816430000 0.167296000  
 5 0.000104000 -0.695565000 -0.035083000  
 5 -0.889506000 0.834463000 -0.162482000  
 5 -1.601427000 -0.510190000 0.100430000

0-2<sup>2-</sup> HF=-137.2379202  
 5 1.630305000 -0.433924000 0.051686000  
 6 0.695245000 0.642354000 -0.161562000  
 5 -0.060860000 -0.733578000 0.072297000  
 5 -0.727253000 0.834245000 0.181301000  
 5 -1.676487000 -0.437568000 -0.111410000

0-3<sup>2-</sup> HF=-137.225684  
 5 0.000000000 1.544966000 0.612044000  
 5 0.000000000 0.792436000 -0.888620000  
 6 0.000000000 0.000000000 0.460961000  
 5 0.000000000 -0.792436000 -0.888620000  
 5 0.000000000 -1.544966000 0.612044000

1-Al-1<sup>2-</sup> HF=-354.9191379  
 5 -1.342602000 1.820894000 0.000000000  
 6 -1.497446000 0.352397000 0.000000000  
 5 -0.699417000 -0.844878000 0.000000000  
 13 1.476521000 -0.829739000 0.000000000  
 5 0.000000000 0.758430000 0.000000000

1-Al-2<sup>-</sup> HF=-354.9072236  
5 0.946499000 -0.650127000 0.000000000  
6 0.000000000 0.586993000 0.000000000  
5 1.549273000 0.829030000 0.000000000  
5 0.410885000 2.055710000 0.000000000  
13 -1.117945000 -1.130386000 0.000000000

1-Al-3<sup>-</sup> HF=-354.9078776  
5 -1.232651000 1.972902000 0.000000000  
5 -1.619669000 0.354549000 0.000000000  
13 1.366233000 -0.901902000 0.000000000  
6 -0.583239000 -0.648202000 0.000000000  
5 0.000000000 0.795338000 0.000000000

1-Ga-1<sup>-</sup> HF=-2037.4115353  
5 -0.937885000 -2.662515000 0.000000000  
6 0.419371000 -2.077743000 0.000000000  
5 -0.659049000 -0.973134000 0.000000000  
5 1.093689000 -0.807863000 0.000000000  
31 0.000000000 1.118839000 0.000000000

1-Ga-2<sup>-</sup> HF=-2037.3978392  
5 1.136479000 -2.359509000 0.000000000  
5 -0.534399000 -2.275721000 0.000000000  
6 0.419543000 -1.035537000 0.000000000  
5 -1.105532000 -0.777276000 0.000000000  
31 0.000000000 1.073411000 0.000000000

1-Ga-3<sup>-</sup> HF=-2037.3911656  
5 -0.635926000 1.154308000 -0.160545000  
5 -2.127709000 0.696226000 0.182440000  
31 1.104332000 -0.073437000 0.012019000  
6 -2.535018000 -0.705978000 -0.057686000  
5 -1.041204000 -0.548051000 -0.027189000

2-Al-1<sup>-</sup> HF=-572.5882887  
13 -2.173414000 0.271853000 0.000000000  
5 0.000000000 0.419810000 0.000000000  
6 -0.671034000 -0.978729000 0.000000000  
5 0.757074000 -1.136402000 0.000000000  
13 2.191940000 0.455481000 0.000000000

2-Al-2<sup>-</sup> HF=-572.5799862  
13 0.000000000 1.958800000 0.486452000  
6 0.000000000 0.000000000 0.041590000  
5 0.000000000 0.801821000 -1.289729000  
5 0.000000000 -0.801821000 -1.289729000  
13 0.000000000 -1.958800000 0.486452000

2-Al-3<sup>-</sup> HF=-572.5760203  
5 -2.520162000 -0.614594000 0.000109000

|    |              |              |              |
|----|--------------|--------------|--------------|
| 6  | -1.128679000 | -0.956814000 | 0.000333000  |
| 5  | 0.283954000  | -0.984711000 | 0.000064000  |
| 13 | 2.155778000  | -0.057291000 | -0.000172000 |
| 13 | -0.774769000 | 1.114015000  | -0.000047000 |

2-Ga-1<sup>2-</sup> HF=-3937.5686112

|    |              |              |             |
|----|--------------|--------------|-------------|
| 31 | 2.216172000  | 0.035952000  | 0.000000000 |
| 5  | 0.000000000  | 0.203680000  | 0.000000000 |
| 6  | 0.607664000  | -1.208995000 | 0.000000000 |
| 5  | -0.823423000 | -1.332216000 | 0.000000000 |
| 31 | -2.200974000 | 0.380069000  | 0.000000000 |

2-Ga-2<sup>2-</sup> HF=-3937.5566752

|    |             |              |              |
|----|-------------|--------------|--------------|
| 31 | 0.000000000 | 2.029280000  | -0.263543000 |
| 5  | 0.000000000 | 0.800783000  | 1.518215000  |
| 6  | 0.000000000 | 0.000000000  | 0.192922000  |
| 5  | 0.000000000 | -0.800783000 | 1.518215000  |
| 31 | 0.000000000 | -2.029280000 | -0.263543000 |

2-Ga-3<sup>2-</sup> HF=-3937.5673814

|    |              |              |             |
|----|--------------|--------------|-------------|
| 5  | -2.822683000 | 1.036211000  | 0.000000000 |
| 31 | -1.116704000 | -0.875822000 | 0.000000000 |
| 6  | -1.411384000 | 1.286727000  | 0.000000000 |
| 5  | 0.000000000  | 1.280066000  | 0.000000000 |
| 31 | 1.845146000  | 0.253185000  | 0.000000000 |

2-Ga-4<sup>2-</sup> HF=-3937.5619216

|    |              |              |              |
|----|--------------|--------------|--------------|
| 6  | -0.001967000 | 2.600636000  | -0.000242000 |
| 5  | -0.781607000 | 1.498954000  | 0.455199000  |
| 5  | 0.778656000  | 1.499270000  | -0.454862000 |
| 31 | -1.410874000 | -0.494206000 | -0.040573000 |
| 31 | 1.411731000  | -0.492727000 | 0.040565000  |

2-Ga-5<sup>2-</sup> HF=-3937.5541261

|    |              |              |             |
|----|--------------|--------------|-------------|
| 5  | -1.048968000 | 2.525610000  | 0.000000000 |
| 5  | 0.000000000  | 1.134991000  | 0.000000000 |
| 31 | 1.769731000  | 0.025718000  | 0.000000000 |
| 31 | -1.308701000 | -0.841211000 | 0.000000000 |
| 6  | -1.507853000 | 1.162883000  | 0.000000000 |

3-Al-1<sup>2-</sup> HF=-790.2375371

|    |              |              |             |
|----|--------------|--------------|-------------|
| 13 | 1.974545000  | 0.600727000  | 0.000000000 |
| 5  | 0.000006000  | 1.543700000  | 0.000000000 |
| 13 | -1.974541000 | 0.600743000  | 0.000000000 |
| 13 | -0.000007000 | -1.833662000 | 0.000000000 |
| 6  | 0.000000000  | 0.083333000  | 0.000000000 |

3-Al-2<sup>2-</sup> HF=-790.2414395

|    |              |             |             |
|----|--------------|-------------|-------------|
| 13 | -1.745934000 | 1.852761000 | 0.000000000 |
| 6  | 0.000000000  | 1.080047000 | 0.000000000 |
| 5  | 1.166146000  | 0.301147000 | 0.000000000 |

|    |              |              |             |
|----|--------------|--------------|-------------|
| 13 | 2.081445000  | -1.598928000 | 0.000000000 |
| 13 | -0.784029000 | -0.868141000 | 0.000000000 |

3-Al-3<sup>2-</sup> HF=-790.2337962

|    |              |              |             |
|----|--------------|--------------|-------------|
| 6  | 0.915331000  | -0.730362000 | 0.000000000 |
| 5  | 0.000000000  | 0.398188000  | 0.000000000 |
| 13 | -1.901565000 | 1.246647000  | 0.000000000 |
| 13 | -0.805206000 | -1.693524000 | 0.000000000 |
| 13 | 2.284310000  | 0.630818000  | 0.000000000 |

3-Ga-1<sup>2-</sup> HF=-5837.7117681

|    |              |              |             |
|----|--------------|--------------|-------------|
| 5  | 0.000005000  | 1.602902000  | 0.000000000 |
| 31 | 2.049788000  | 0.758439000  | 0.000000000 |
| 6  | 0.000000000  | 0.150276000  | 0.000000000 |
| 31 | -0.000006000 | -1.804513000 | 0.000000000 |
| 31 | -2.049784000 | 0.758455000  | 0.000000000 |

3-Ga-2<sup>2-</sup> HF=-5837.7224937

|    |              |              |             |
|----|--------------|--------------|-------------|
| 6  | -0.722490000 | -0.947695000 | 0.000000000 |
| 5  | 0.664453000  | -1.151350000 | 0.000000000 |
| 31 | 2.621807000  | -0.329282000 | 0.000000000 |
| 31 | 0.000000000  | 1.111048000  | 0.000000000 |
| 31 | -2.589140000 | -0.412639000 | 0.000000000 |

S1-2. CB<sub>x</sub>E<sub>y</sub>Mg

0-Mg-1 HF=-337.4058032

|    |              |              |              |
|----|--------------|--------------|--------------|
| 6  | -0.386397000 | 0.083438000  | 0.562375000  |
| 5  | 0.625527000  | 1.025162000  | 0.086660000  |
| 5  | 0.870081000  | -0.658409000 | 0.136098000  |
| 5  | 2.094854000  | 0.640131000  | -0.322670000 |
| 5  | 2.392002000  | -0.834756000 | -0.118936000 |
| 12 | -2.299495000 | -0.113439000 | -0.190001000 |

0-Mg-2 HF=-337.402244

|    |              |              |              |
|----|--------------|--------------|--------------|
| 6  | -2.320167000 | -0.652631000 | -0.161530000 |
| 5  | -0.915617000 | -0.650421000 | 0.206183000  |
| 5  | -1.871869000 | 0.649394000  | -0.474338000 |
| 5  | 0.450029000  | -0.010405000 | 0.823253000  |
| 5  | -0.499804000 | 1.074381000  | 0.236854000  |
| 12 | 2.342276000  | -0.116580000 | -0.249215000 |

0-Mg-3 HF=-337.397251

|    |              |              |              |
|----|--------------|--------------|--------------|
| 5  | 0.060100000  | -0.102561000 | -1.406480000 |
| 5  | 0.060100000  | -1.640298000 | -0.798561000 |
| 6  | 0.567387000  | -0.408904000 | 0.000000000  |
| 5  | 0.060100000  | -1.640298000 | 0.798561000  |
| 5  | 0.060100000  | -0.102561000 | 1.406480000  |
| 12 | -0.383859000 | 1.656834000  | 0.000000000  |

1-AlM-1 HF=-555.0626901

|    |              |              |              |
|----|--------------|--------------|--------------|
| 5  | -1.440879000 | 1.059341000  | -0.015055000 |
| 6  | -0.043522000 | 0.492878000  | 0.181053000  |
| 5  | -0.176348000 | 2.031706000  | -0.075236000 |
| 5  | 1.257869000  | 1.284031000  | -0.028811000 |
| 13 | -1.338571000 | -1.084790000 | -0.022077000 |
| 12 | 1.621612000  | -0.894200000 | -0.016984000 |

1-AIM-2 HF=-555.0600657

|    |              |              |             |
|----|--------------|--------------|-------------|
| 5  | -1.847856000 | 0.838640000  | 0.000000000 |
| 5  | 0.000000000  | 0.505716000  | 0.000000000 |
| 13 | 1.665909000  | -2.256746000 | 0.000000000 |
| 6  | 0.155140000  | -0.965345000 | 0.000000000 |
| 5  | -1.263173000 | -0.640749000 | 0.000000000 |
| 12 | -0.586042000 | 2.634311000  | 0.000000000 |

1-AIM-3 HF=-555.0580934

|    |              |              |              |
|----|--------------|--------------|--------------|
| 5  | -0.958266000 | 0.191058000  | 0.001004000  |
| 6  | 0.169341000  | 1.111745000  | 0.000169000  |
| 5  | 0.568163000  | -0.398725000 | 0.000860000  |
| 5  | 1.595961000  | 1.204836000  | -0.000588000 |
| 13 | -3.074294000 | -0.307840000 | -0.000359000 |
| 12 | 2.743374000  | -0.637867000 | -0.000227000 |

1-AIM-4 HF=-555.0652293

|    |              |              |             |
|----|--------------|--------------|-------------|
| 5  | 0.507670000  | -0.908910000 | 0.000000000 |
| 6  | -0.904164000 | -0.701033000 | 0.000000000 |
| 5  | -1.748524000 | 0.477098000  | 0.000000000 |
| 13 | -1.128016000 | 2.528915000  | 0.000000000 |
| 5  | 0.000000000  | 0.610016000  | 0.000000000 |
| 12 | 2.191122000  | -2.463393000 | 0.000000000 |

1-AIM-5 HF=-555.0530811

|    |              |              |              |
|----|--------------|--------------|--------------|
| 5  | 0.791667000  | 1.409359000  | 0.007904000  |
| 13 | 2.040964000  | -0.365756000 | -0.143040000 |
| 5  | -0.095720000 | -1.243803000 | 0.229527000  |
| 5  | -0.830763000 | 1.414674000  | -0.051761000 |
| 6  | 0.054341000  | 0.189394000  | 0.424096000  |
| 12 | -2.182042000 | -0.356890000 | -0.134450000 |

1-AIM-6 HF=-555.0571829

|    |              |              |             |
|----|--------------|--------------|-------------|
| 5  | 0.402421000  | -1.031302000 | 0.000000000 |
| 5  | -1.140834000 | -0.720902000 | 0.000000000 |
| 13 | -0.948095000 | 2.530648000  | 0.000000000 |
| 6  | -1.564327000 | 0.657008000  | 0.000000000 |
| 5  | 0.000000000  | 0.517698000  | 0.000000000 |
| 12 | 2.116939000  | -2.555661000 | 0.000000000 |

1-AIM-7 HF=-555.0570219

|   |             |             |             |
|---|-------------|-------------|-------------|
| 5 | 0.932479000 | 1.764959000 | 0.000000000 |
| 6 | 0.000000000 | 0.444088000 | 0.000000000 |
| 5 | 1.608915000 | 0.328495000 | 0.000000000 |



|    |              |              |             |
|----|--------------|--------------|-------------|
| 5  | 0.600082000  | -0.881370000 | 0.000000000 |
| 13 | -1.150697000 | 2.167091000  | 0.000000000 |
| 12 | -0.062359000 | -3.074761000 | 0.000000000 |

1-GaM-1 HF=-2237.5536658

|    |              |              |              |
|----|--------------|--------------|--------------|
| 5  | -2.308764000 | 0.474767000  | -0.070977000 |
| 5  | -1.483118000 | 1.864848000  | -0.095965000 |
| 6  | -0.786354000 | 0.486036000  | 0.206601000  |
| 5  | 0.094893000  | 1.693100000  | 0.033754000  |
| 31 | 1.308938000  | -0.147628000 | -0.016415000 |
| 12 | -1.447836000 | -1.541943000 | -0.005401000 |

1-GaM-2 HF=-2237.5565576

|    |              |              |             |
|----|--------------|--------------|-------------|
| 5  | 2.677932000  | 0.657134000  | 0.000000000 |
| 5  | 1.190294000  | -0.483849000 | 0.000000000 |
| 5  | 1.191003000  | 1.223927000  | 0.000000000 |
| 6  | 0.000000000  | 0.386646000  | 0.000000000 |
| 31 | -2.039815000 | 0.274402000  | 0.000000000 |
| 12 | 3.161510000  | -1.484366000 | 0.000000000 |

1-GaM-3 HF=-2237.5601976

|    |              |              |             |
|----|--------------|--------------|-------------|
| 5  | 2.742848000  | 0.327432000  | 0.000000000 |
| 6  | 1.363856000  | 0.707327000  | 0.000000000 |
| 5  | 1.250908000  | -0.851832000 | 0.000000000 |
| 5  | 0.000000000  | 0.194168000  | 0.000000000 |
| 31 | -2.158509000 | 0.608513000  | 0.000000000 |
| 12 | 3.230154000  | -1.788058000 | 0.000000000 |

1-GaM-4 HF=-2237.559468

|    |              |              |             |
|----|--------------|--------------|-------------|
| 5  | 1.230676000  | 1.390195000  | 0.000000000 |
| 6  | 1.553218000  | 0.006403000  | 0.000000000 |
| 5  | 0.000000000  | 0.375762000  | 0.000000000 |
| 5  | 0.759364000  | -1.215283000 | 0.000000000 |
| 31 | -1.430582000 | -1.448165000 | 0.000000000 |
| 12 | 2.089877000  | 3.508444000  | 0.000000000 |

1-GaM-5 HF=-2237.5445679

|    |              |              |              |
|----|--------------|--------------|--------------|
| 5  | -0.658857000 | 0.228585000  | 0.924298000  |
| 5  | -2.278948000 | -0.071769000 | 0.754030000  |
| 31 | 1.019585000  | -0.671118000 | -0.010027000 |
| 6  | -2.712557000 | -0.433244000 | -0.516863000 |
| 5  | -1.322637000 | -0.312268000 | -0.661389000 |
| 12 | 0.497535000  | 2.015115000  | -0.139390000 |

1-GaM-6 HF=-2237.55173

|    |              |              |             |
|----|--------------|--------------|-------------|
| 5  | 0.000000000  | 0.302477000  | 0.000000000 |
| 5  | 1.313006000  | -0.675960000 | 0.000000000 |
| 31 | -2.190980000 | 0.566976000  | 0.000000000 |
| 6  | 2.664080000  | 0.194411000  | 0.000000000 |
| 5  | 1.456787000  | 0.976706000  | 0.000000000 |
| 12 | 3.173911000  | -1.813236000 | 0.000000000 |

1-GaM-7 HF=-2237.5488972  
5 -3.291651000 -0.130275000 0.000003000  
6 -2.873475000 -1.478194000 0.000029000  
5 -1.550108000 -1.022874000 -0.000071000  
31 2.052337000 -0.064327000 0.000000000  
5 -0.151352000 -0.218853000 0.000044000  
12 -1.784671000 1.476942000 -0.000003000

2-AIM-1 HF=-772.7185921  
13 0.000000000 2.114495000 -0.071325000  
6 0.000000000 0.000000000 -0.377720000  
5 0.000000000 0.794403000 -1.673209000  
5 0.000000000 -0.794403000 -1.673209000  
13 0.000000000 -2.114495000 -0.071325000  
12 0.000000000 0.000000000 1.737740000

2-AIM-2 HF=-772.7185902  
13 1.349916000 1.432292000 -0.020941000  
6 -0.226095000 0.011545000 0.105474000  
5 -0.775016000 1.351970000 0.036544000  
13 -2.397201000 -0.170897000 -0.038095000  
5 -0.474117000 -1.414805000 0.040137000  
12 1.768079000 -1.346102000 -0.020731000

2-AIM-3 HF=-772.7212229  
13 0.211553000 -2.358274000 0.000000000  
5 0.000000000 0.397515000 0.000000000  
6 -0.912188000 -0.758408000 0.000000000  
5 -1.743108000 0.405644000 0.000000000  
13 -1.137341000 2.520818000 0.000000000  
12 2.185326000 -0.131535000 0.000000000

2-AIM-4 HF=-772.7134093  
5 0.000000000 1.049531000 0.761875000  
13 0.000000000 1.619878000 -1.499744000  
6 0.000000000 0.000000000 -0.260072000  
13 0.000000000 -1.619878000 -1.499744000  
5 0.000000000 -1.049531000 0.761875000  
12 0.000000000 0.000000000 2.744586000

2-AIM-5 HF=-772.7189442  
13 2.755683000 -1.046440000 0.000000000  
5 0.351646000 -0.793961000 0.000000000  
6 1.337740000 0.360178000 0.000000000  
5 0.000000000 0.835742000 0.000000000  
13 -1.702655000 -0.908014000 0.000000000  
12 -1.956170000 1.919826000 0.000000000

2-AIM-6 HF=-772.7199097  
13 3.015529000 -0.126074000 0.000000000

|    |              |              |             |
|----|--------------|--------------|-------------|
| 5  | 0.000000000  | 0.365698000  | 0.000000000 |
| 6  | 1.088404000  | -0.576363000 | 0.000000000 |
| 5  | 0.064834000  | -1.601804000 | 0.000000000 |
| 13 | -1.583356000 | 1.817615000  | 0.000000000 |
| 12 | -2.122737000 | -1.029277000 | 0.000000000 |

2-AIM-7 HF=-772.7175032

|    |              |              |             |
|----|--------------|--------------|-------------|
| 13 | 2.868121000  | -0.356675000 | 0.000000000 |
| 5  | 0.000000000  | 0.143970000  | 0.000000000 |
| 6  | 0.982602000  | -0.928197000 | 0.000000000 |
| 5  | -0.341306000 | -1.536145000 | 0.000000000 |
| 13 | -2.210018000 | -0.605214000 | 0.000000000 |
| 12 | -1.062035000 | 2.086218000  | 0.000000000 |

2-AIM-8 HF=-772.7166084

|    |              |              |             |
|----|--------------|--------------|-------------|
| 5  | -1.767196000 | -1.342523000 | 0.000000000 |
| 6  | -0.359175000 | -1.186181000 | 0.000000000 |
| 5  | 1.040036000  | -1.061653000 | 0.000000000 |
| 13 | 2.989459000  | -0.074847000 | 0.000000000 |
| 13 | 0.000000000  | 0.947314000  | 0.000000000 |
| 12 | -2.756010000 | 0.649658000  | 0.000000000 |

2-AIM-9 HF=-772.7123619

|    |              |              |             |
|----|--------------|--------------|-------------|
| 13 | -0.294838000 | -1.574929000 | 0.000000000 |
| 6  | 0.000000000  | 0.347827000  | 0.000000000 |
| 5  | 1.114349000  | 1.413207000  | 0.000000000 |
| 5  | -0.439893000 | 1.783557000  | 0.000000000 |
| 13 | -2.123842000 | 0.539554000  | 0.000000000 |
| 12 | 2.339213000  | -0.384241000 | 0.000000000 |

2-AIM-10 HF=-772.712614

|    |              |              |             |
|----|--------------|--------------|-------------|
| 13 | -1.910407000 | 1.394203000  | 0.000000000 |
| 5  | -0.814353000 | -0.515560000 | 0.000000000 |
| 6  | 0.000000000  | 0.770865000  | 0.000000000 |
| 5  | 0.828148000  | -0.493043000 | 0.000000000 |
| 13 | -0.023828000 | -2.541804000 | 0.000000000 |
| 12 | 2.089674000  | 1.278053000  | 0.000000000 |

2-AIM-11 HF=-772.7098974

|    |              |              |             |
|----|--------------|--------------|-------------|
| 13 | -1.710812000 | -0.900953000 | 0.000000000 |
| 5  | 0.368499000  | -0.714989000 | 0.000000000 |
| 6  | 0.000000000  | 0.720426000  | 0.000000000 |
| 5  | 1.433991000  | 0.666778000  | 0.000000000 |
| 13 | 2.678522000  | -1.155492000 | 0.000000000 |
| 12 | -1.799390000 | 1.887690000  | 0.000000000 |

2-AIM-12 HF=-772.7126541

|    |              |              |              |
|----|--------------|--------------|--------------|
| 5  | 1.369470000  | 0.008109000  | 0.000409000  |
| 6  | 0.296923000  | -0.893936000 | -0.000173000 |
| 5  | -1.098990000 | -1.035863000 | -0.000376000 |
| 13 | -3.176238000 | -0.255953000 | 0.000239000  |

|    |              |              |              |
|----|--------------|--------------|--------------|
| 13 | -0.440581000 | 1.225845000  | -0.000201000 |
| 12 | 3.657059000  | -0.175516000 | 0.000031000  |

2-GaM-1 HF=-4137.7058197

|    |              |              |             |
|----|--------------|--------------|-------------|
| 31 | 2.288294000  | 0.055287000  | 0.000000000 |
| 5  | 0.803798000  | 1.576724000  | 0.000000000 |
| 6  | 0.000000000  | 0.316100000  | 0.000000000 |
| 5  | -0.803167000 | 1.577186000  | 0.000000000 |
| 31 | -2.288282000 | 0.056290000  | 0.000000000 |
| 12 | -0.000294000 | -1.760418000 | 0.000000000 |

2-GaM-2 HF=-4137.7101058

|    |              |              |              |
|----|--------------|--------------|--------------|
| 31 | 1.820015000  | -0.776480000 | -0.067044000 |
| 5  | -0.565996000 | 1.549415000  | 0.296470000  |
| 5  | -0.263851000 | -1.161744000 | 0.360738000  |
| 31 | -2.287545000 | -0.114229000 | -0.111133000 |
| 6  | -0.085174000 | 0.239658000  | 0.629924000  |
| 12 | 1.596142000  | 2.019640000  | -0.128508000 |

2-GaM-3 HF=-4137.716336

|    |              |              |             |
|----|--------------|--------------|-------------|
| 31 | -1.484465000 | -1.976982000 | 0.000000000 |
| 5  | 0.000000000  | 0.426964000  | 0.000000000 |
| 6  | 0.289578000  | -1.007170000 | 0.000000000 |
| 5  | 1.570429000  | -0.383577000 | 0.000000000 |
| 31 | 2.030469000  | 1.808789000  | 0.000000000 |
| 12 | -2.209644000 | 0.920006000  | 0.000000000 |

2-GaM-4 HF=-4137.7039268

|    |             |              |              |
|----|-------------|--------------|--------------|
| 31 | 0.000000000 | 1.688844000  | -0.918029000 |
| 5  | 0.000000000 | 1.054594000  | 1.396713000  |
| 6  | 0.000000000 | 0.000000000  | 0.382733000  |
| 5  | 0.000000000 | -1.054594000 | 1.396713000  |
| 31 | 0.000000000 | -1.688844000 | -0.918029000 |
| 12 | 0.000000000 | 0.000000000  | 3.387853000  |

2-GaM-5 HF=-4137.7107406

|    |              |              |             |
|----|--------------|--------------|-------------|
| 31 | 2.414434000  | 1.238878000  | 0.000000000 |
| 5  | 0.000000000  | 0.420307000  | 0.000000000 |
| 6  | 1.228804000  | -0.458572000 | 0.000000000 |
| 5  | 0.056557000  | -1.252812000 | 0.000000000 |
| 31 | -2.039731000 | 0.051839000  | 0.000000000 |
| 12 | -1.605952000 | -2.758187000 | 0.000000000 |

2-GaM-6 HF=-4137.7175591

|    |              |              |             |
|----|--------------|--------------|-------------|
| 5  | 1.925116000  | -0.256966000 | 0.000000000 |
| 5  | 0.000000000  | 0.298604000  | 0.000000000 |
| 31 | -1.031527000 | 2.235584000  | 0.000000000 |
| 31 | -0.138704000 | -2.836600000 | 0.000000000 |
| 6  | 0.666774000  | -0.970738000 | 0.000000000 |
| 12 | 1.887579000  | 2.020645000  | 0.000000000 |

2-GaM-7 HF=-4137.7105063  
31 2.569343000 -1.365694000 0.000000000  
5 0.000000000 0.625689000 0.000000000  
6 0.672521000 -0.640338000 0.000000000  
5 -0.766604000 -0.934407000 0.000000000  
31 -2.362767000 0.452551000 0.000000000  
12 -0.550497000 2.807752000 0.000000000

2-GaM-8 HF=-4137.7162412  
5 2.203253000 1.822600000 0.000307000  
6 0.827863000 1.491321000 0.000363000  
5 -0.538646000 1.188481000 0.000366000  
31 -2.438470000 0.054768000 -0.000235000  
31 0.703321000 -0.804089000 0.000336000  
12 3.374950000 -0.064532000 -0.000723000

2-GaM-9 HF=-4137.7061336  
5 2.764488000 -0.000002000 -0.234952000  
6 2.235415000 -0.000002000 -1.530143000  
5 0.943971000 -0.000001000 -1.008257000  
31 -0.791926000 -1.247771000 -0.047441000  
31 -0.791924000 1.247772000 -0.047442000  
12 1.428714000 0.000000000 1.528188000

2-GaM-10 HF=-4137.7040977  
5 2.326927000 -0.575990000 0.622837000  
31 1.079887000 0.527291000 -0.693899000  
6 1.679193000 -1.373718000 1.556389000  
5 0.461377000 -0.969901000 1.015312000  
31 -1.403557000 -0.635015000 -0.351869000  
12 -1.165244000 1.609265000 1.240811000

2-GaM-11 HF=-4137.708308  
31 1.927287000 -0.608299000 0.000000000  
5 0.000000000 0.286598000 0.000000000  
6 -0.509969000 -1.086391000 0.000000000  
5 -1.681099000 -0.258607000 0.000000000  
31 -1.724375000 1.983089000 0.000000000  
12 0.431252000 -3.020008000 0.000000000

2-GaM-12 HF=-4137.7085195  
5 -2.718907000 0.518131000 0.000000000  
31 -1.877958000 -1.405632000 0.000000000  
6 -1.383012000 0.942424000 0.000000000  
5 0.000000000 1.163875000 0.000000000  
31 2.200358000 1.435555000 0.000000000  
12 0.991519000 -1.249347000 0.000000000

2-GaM-13 HF=-4137.7111419  
5 2.073912000 0.386907000 0.000000000  
31 0.000000000 1.261066000 0.000000000

|    |              |              |             |
|----|--------------|--------------|-------------|
| 6  | 1.271559000  | -0.763830000 | 0.000000000 |
| 5  | -0.025856000 | -1.278691000 | 0.000000000 |
| 31 | -2.257211000 | -1.265856000 | 0.000000000 |
| 12 | 4.341993000  | 0.765865000  | 0.000000000 |

3-AIM-1 HF=-990.3731681

|    |              |              |             |
|----|--------------|--------------|-------------|
| 13 | -1.246553000 | 2.017423000  | 0.000000000 |
| 5  | 0.767213000  | 1.358151000  | 0.000000000 |
| 13 | 2.305677000  | -0.036752000 | 0.000000000 |
| 13 | -1.818759000 | -0.646385000 | 0.000000000 |
| 6  | 0.000000000  | 0.157377000  | 0.000000000 |
| 12 | 0.503265000  | -2.090061000 | 0.000000000 |

3-AIM-2 HF=-990.3785093

|    |              |              |             |
|----|--------------|--------------|-------------|
| 13 | -1.650090000 | -0.799088000 | 0.000000000 |
| 5  | 1.064576000  | -0.630425000 | 0.000000000 |
| 13 | 1.830317000  | 1.429536000  | 0.000000000 |
| 13 | -0.971793000 | 2.057184000  | 0.000000000 |
| 6  | 0.000000000  | 0.307312000  | 0.000000000 |
| 12 | 0.413956000  | -2.802580000 | 0.000000000 |

3-AIM-3 HF=-990.3808472

|    |              |              |             |
|----|--------------|--------------|-------------|
| 13 | 0.272912000  | -1.942098000 | 0.000000000 |
| 6  | 1.172626000  | -0.211676000 | 0.000000000 |
| 5  | 0.000000000  | 0.549794000  | 0.000000000 |
| 13 | -1.597648000 | 2.009390000  | 0.000000000 |
| 13 | 2.983289000  | 0.519185000  | 0.000000000 |
| 12 | -2.383079000 | -0.758593000 | 0.000000000 |

3-GaM-1 HF=-6037.8625728

|    |              |              |             |
|----|--------------|--------------|-------------|
| 5  | 1.280932000  | -0.451943000 | 0.000000000 |
| 31 | -0.007927000 | -2.202766000 | 0.000000000 |
| 6  | 0.000000000  | 0.145614000  | 0.000000000 |
| 31 | -2.029363000 | -0.157494000 | 0.000000000 |
| 31 | 2.065499000  | 1.514066000  | 0.000000000 |
| 12 | -0.606594000 | 2.301504000  | 0.000000000 |

3-GaM-2 HF=-6037.8669503

|    |              |              |             |
|----|--------------|--------------|-------------|
| 5  | 1.411238000  | -0.007489000 | 0.000000000 |
| 31 | -0.301498000 | 2.126883000  | 0.000000000 |
| 6  | 0.000000000  | 0.083063000  | 0.000000000 |
| 31 | -1.848243000 | -0.764210000 | 0.000000000 |
| 31 | 0.903803000  | -2.128124000 | 0.000000000 |
| 12 | 2.630657000  | 1.939005000  | 0.000000000 |

3-GaM-3 HF=-6037.8731054

|    |              |              |             |
|----|--------------|--------------|-------------|
| 31 | 2.619926000  | -0.991953000 | 0.000000000 |
| 5  | 0.000000000  | 0.558916000  | 0.000000000 |
| 6  | 0.644593000  | -0.680331000 | 0.000000000 |
| 31 | -1.007730000 | -1.812565000 | 0.000000000 |
| 31 | -0.692557000 | 2.633350000  | 0.000000000 |

|    |              |             |             |
|----|--------------|-------------|-------------|
| 12 | -2.698032000 | 0.549468000 | 0.000000000 |
|----|--------------|-------------|-------------|

3-GaM-4 HF=-6037.8644645

|    |              |              |             |
|----|--------------|--------------|-------------|
| 31 | 2.889897000  | -0.564978000 | 0.000000000 |
| 5  | 0.000000000  | 0.615015000  | 0.000000000 |
| 31 | -2.194500000 | 1.051117000  | 0.000000000 |
| 31 | -0.758325000 | -1.683932000 | 0.000000000 |
| 6  | 0.898429000  | -0.446375000 | 0.000000000 |
| 12 | -0.286650000 | 3.061230000  | 0.000000000 |

3-GaM-5 HF=-6037.8630416

|    |              |              |              |
|----|--------------|--------------|--------------|
| 6  | -1.071295000 | 0.491869000  | 0.000176000  |
| 31 | -2.656126000 | -0.758713000 | 0.000113000  |
| 31 | 1.476769000  | 1.419369000  | 0.000449000  |
| 31 | 1.754404000  | -1.720044000 | -0.000454000 |
| 5  | 0.048042000  | -0.344148000 | 0.002025000  |
| 12 | -0.969909000 | 2.634213000  | -0.001212000 |
